# Supplementary material
Source: ML conference proceedings conference paper supplement (https://openreview.net/forum?id=FMmjDoOsOG)
Supplement: supplementary_material [file attachment]

Dataset Proportion

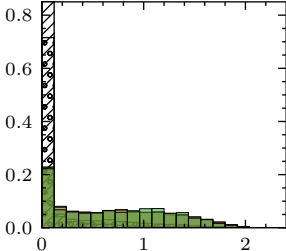

PC Pred. Entropy

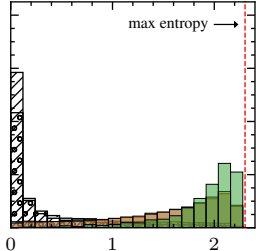

PC + TDI Pred. Entropy

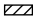

SVHN Train, ID

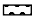

SVHN Test, ID

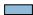

CIFAR-100, OOD

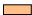

CINIC, OOD

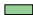

LSUN, OOD
